# Supplementary material
Source: PubMed Central journal article supplement (PMC4097659)
Supplement: MCB.00017-14_zmb999100497so2.pdf [file MCB.00017-14_zmb999100497so2.pdf]

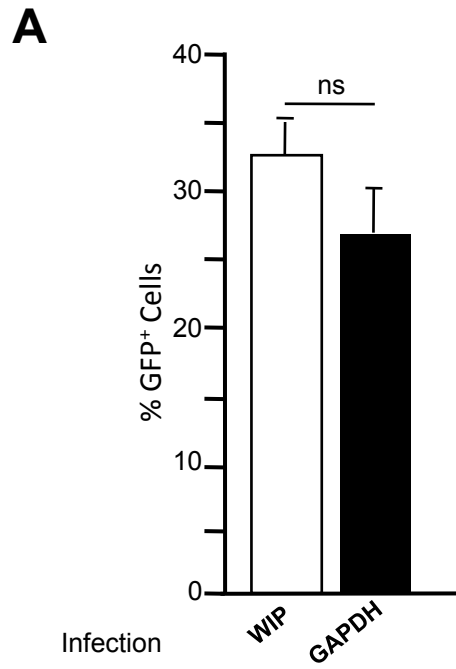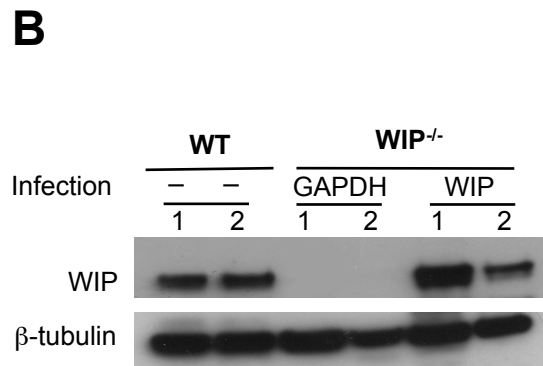

**Fig. S2: Expression of WIP in WIP<sup>-/-</sup> fibroblasts infected with lentivirus encoding WIP-tGFP or GAPDH-tGFP**
