# Supplementary material
Source: PubMed Central journal article supplement (PMC4097659)
Supplement: MCB.00017-14_zmb999100497so3.pdf [file MCB.00017-14_zmb999100497so3.pdf]

**Fig. S3: Stress fibers in *WIP*<sup>-/-</sup> fibroblasts transfected with HA-tagged MRTF-A and HA-tagged MRTF-A<sub>xxx</sub>**
