# Supplementary material
Source: PubMed Central journal article supplement (PMC4097659)

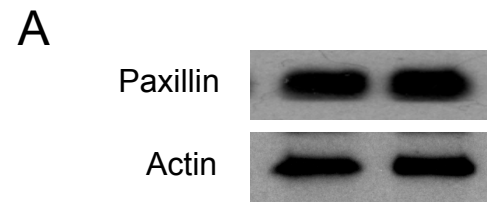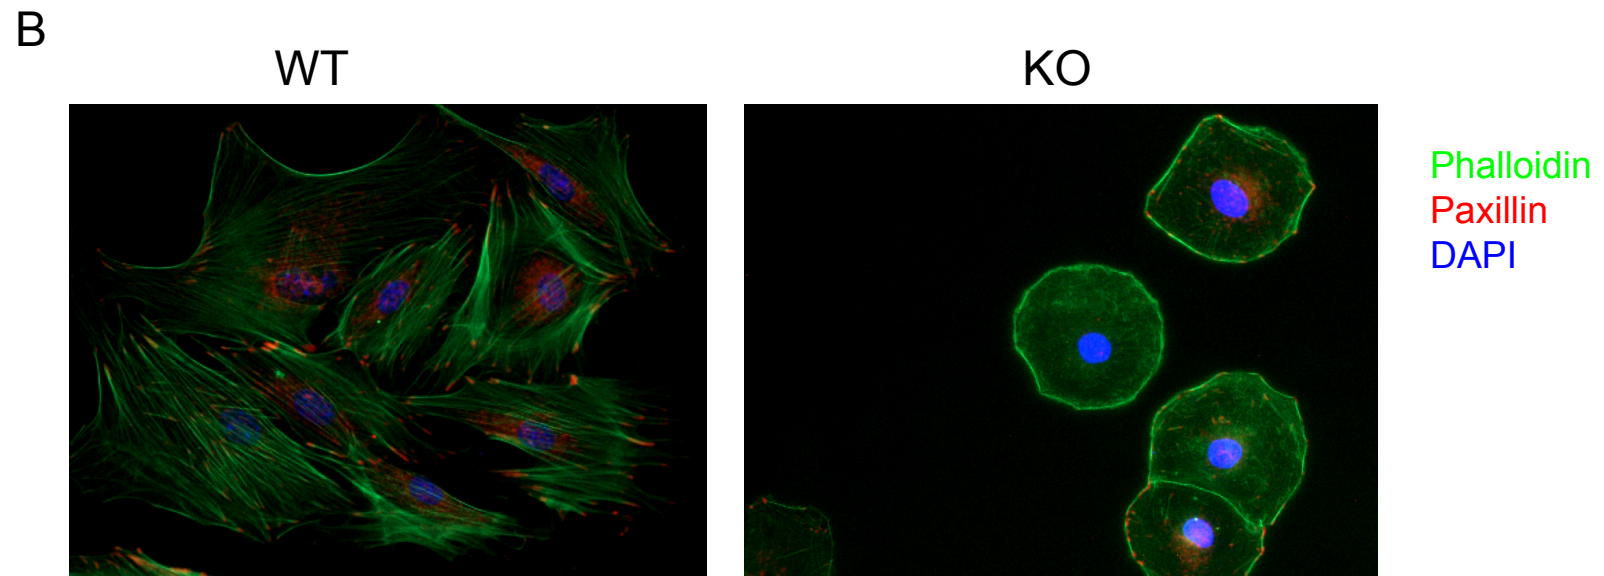

**Fig. S1: Decreased FAs and actin stress fibers in  $WIP^{-/-}$  fibroblasts**

Supplement: MCB.00017-14_zmb999100497so1.pdf [file MCB.00017-14_zmb999100497so1.pdf]
